# Supplementary material
Source: PubMed Central journal article supplement (PMC4216246)
Supplement: supp_141207_edit-children-1-at.pdf [file supp_141207_edit-children-1-at.pdf]

## Appendix 1: References

1. Tennant PW, Pearce MS, Bythell M, et al. 20-year survival of children born with congenital anomalies: a population-based study. *Lancet* 2010;375:649-56.
2. Cohen E, Berry JG, Camacho X, et al. Patterns and costs of health care use of children with medical complexity [supplemental information]. *Pediatrics* 2012;130:e1463-e1470. Available: <http://pediatrics.aappublications.org/content/suppl/2012/11/19/peds.2012-0175.DCSupplemental/peds.2012-0175SupplementaryData.pdf> (accessed 2014 Sept. 17).
3. Cohen E, Patel H. Responding to the rising number of children living with complex chronic conditions. *CMAJ* 2014; Oct. 14 [Epub ahead of print].
4. Kuo DZ, Cohen E, Agrawal R, et al. A national profile of caregiver challenges among more medically complex children with special health care needs. *Arch Pediatr Adolesc Med* 2011;165:1020-6.
5. Brehaut JC, Kohen DE, Garner RE, et al. Health among caregivers of children with health problems: findings from a Canadian population-based study. *Am J Public Health* 2009;99:1254-62.
6. Peter E, Spalding K, Kenny N, et al. Neither seen nor heard: children and homecare policy in Canada. *Soc Sci Med* 2007;64:1624-35.
7. The time for home care investment is now. Hamilton (ON): Ontario Home Care Association; 2013. Available: [www.homecareontario.ca/docs/default-source/position-papers/position-papers/time-for-hc-investment-is-now---may-201305df79fdc99c68708e32ff0000f8dac8.pdf?sfvrsn=6](http://www.homecareontario.ca/docs/default-source/position-papers/position-papers/time-for-hc-investment-is-now---may-201305df79fdc99c68708e32ff0000f8dac8.pdf?sfvrsn=6) (accessed 2014 Sept. 17).
8. Cohen E, Lacombe-Duncan A, Spalding K, et al. Integrated complex care coordination for children with medical complexity: a mixed-methods evaluation of tertiary care-community collaboration. *BMC Health Serv Res* 2012;12:366-77.
